# Supplementary figures and images for: Cytokines present in smokers' serum interact with smoke components to enhance endothelial dysfunction
Source: Oxford University Press journal article supplement (doi:10.1093/cvr/cvr032), 2011-02-01

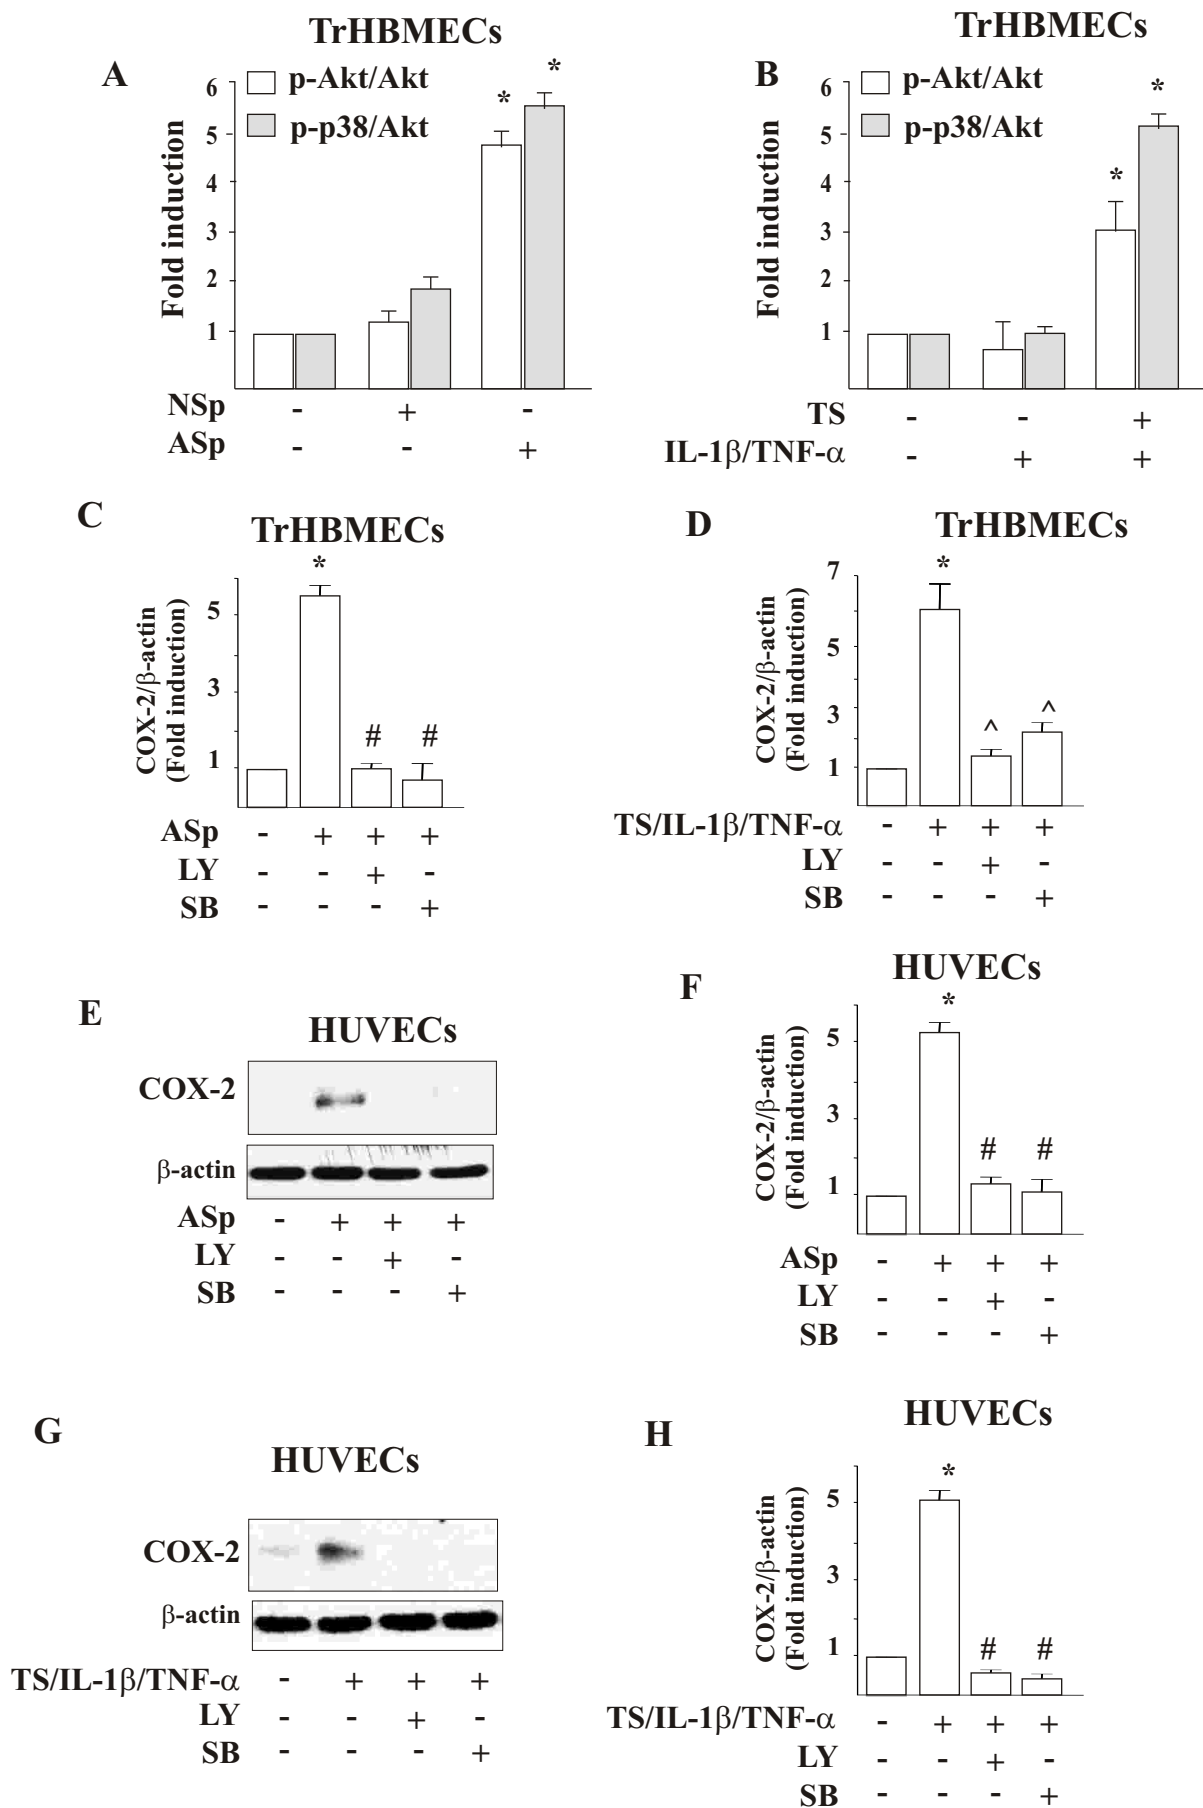

Supplementary Figure S5

Supplement: cvr032_Supplementary_Data.zip [file cvr032_Supplementary_Data.zip]

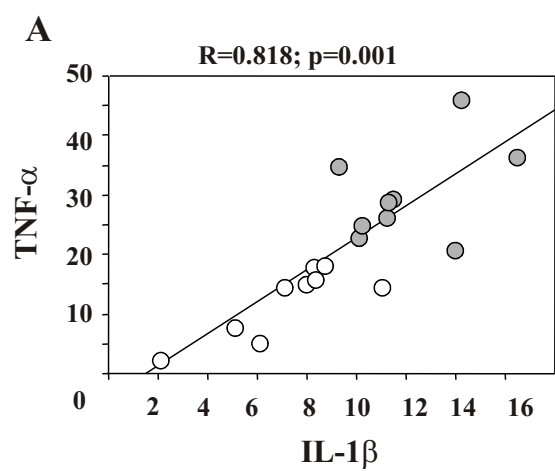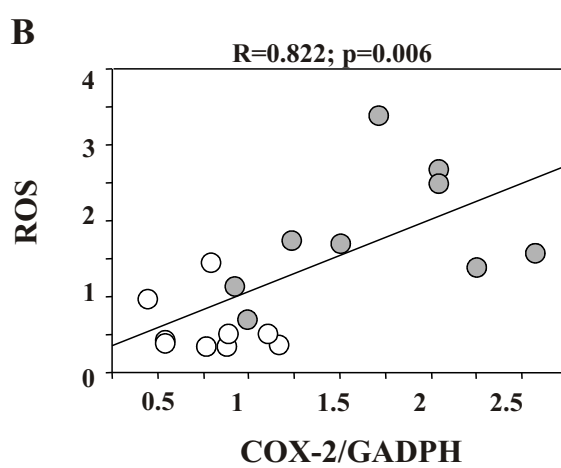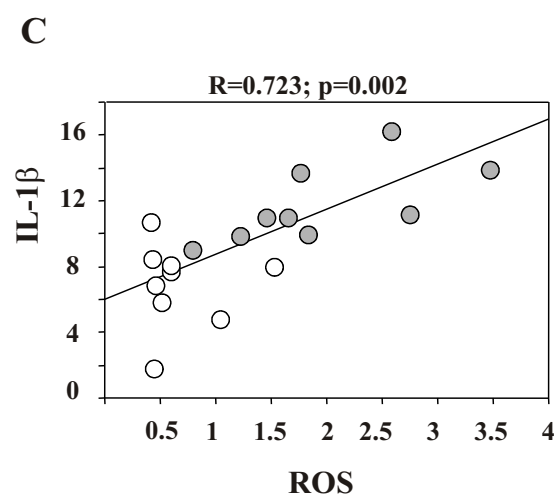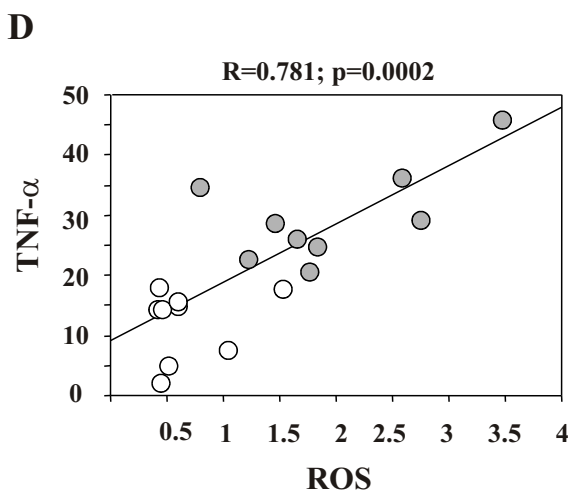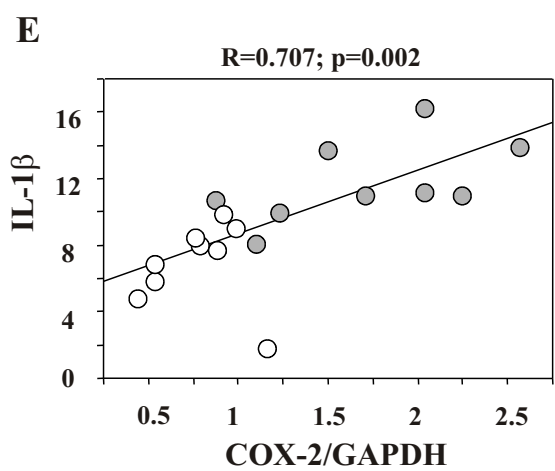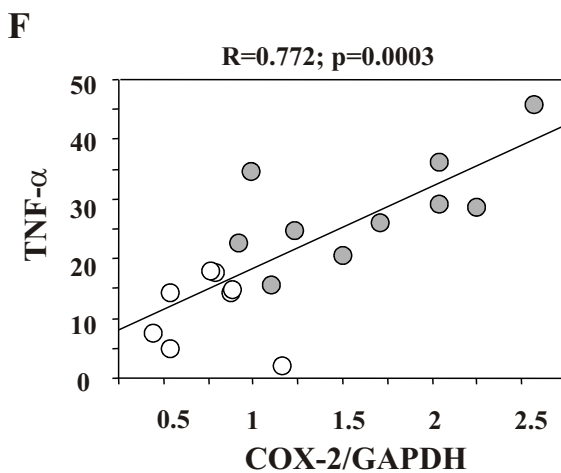

**Supplementary Figure S1**

Supplement: cvr032_Supplementary_Data.zip [file cvr032_Supplementary_Data.zip]

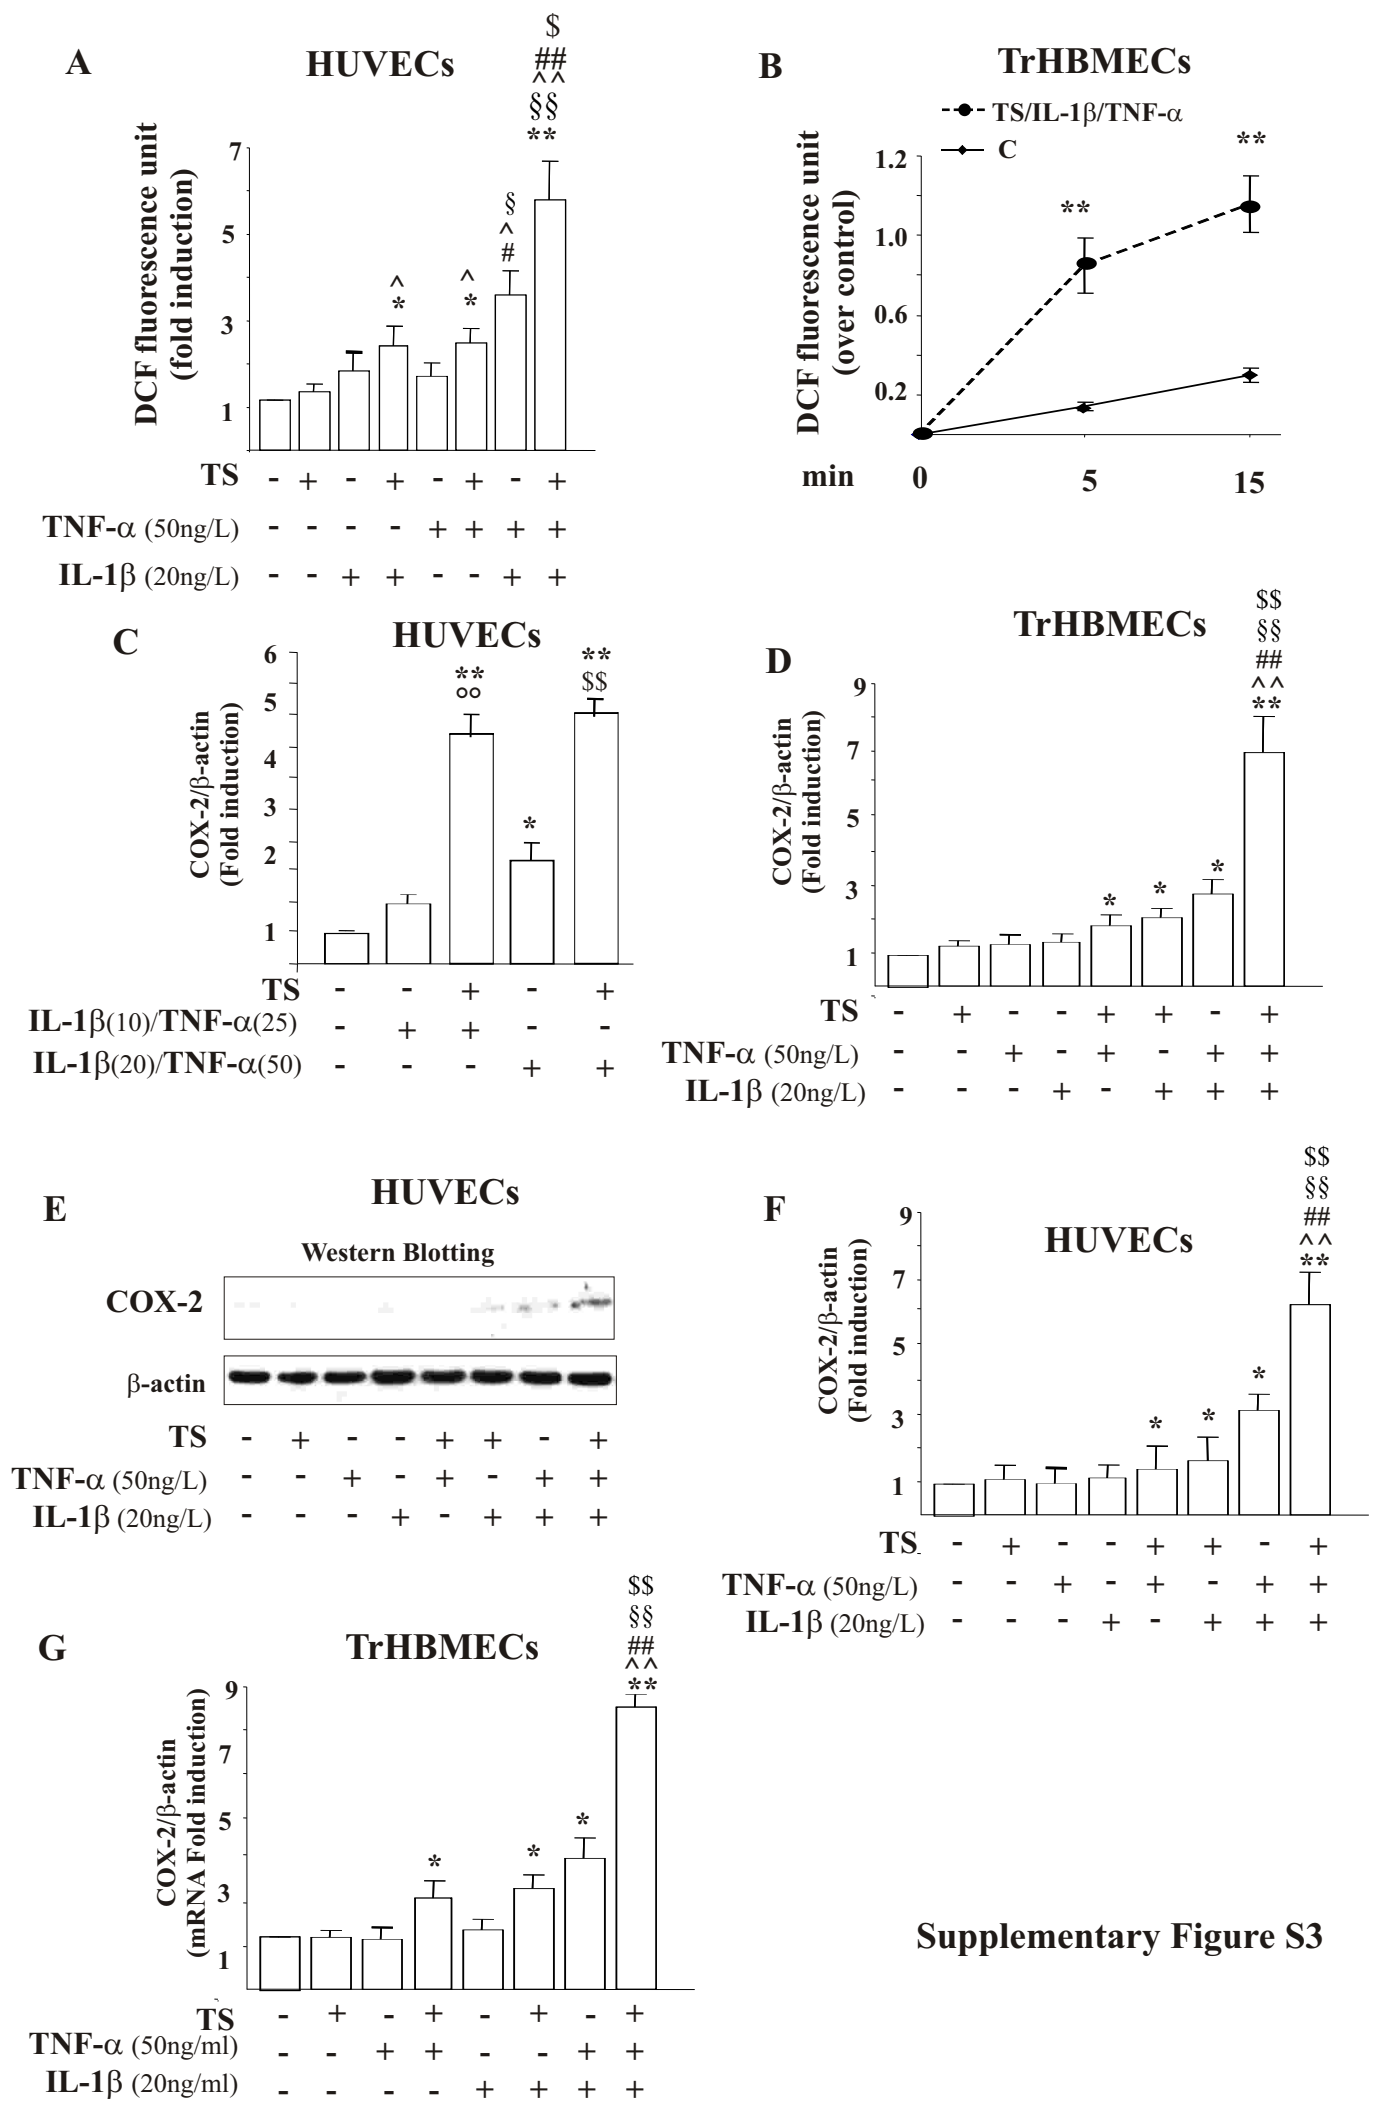

Supplement: cvr032_Supplementary_Data.zip [file cvr032_Supplementary_Data.zip]

# TrHBMECs

**A**

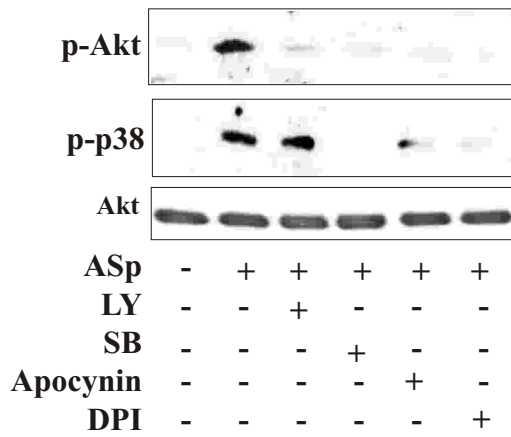

**B**

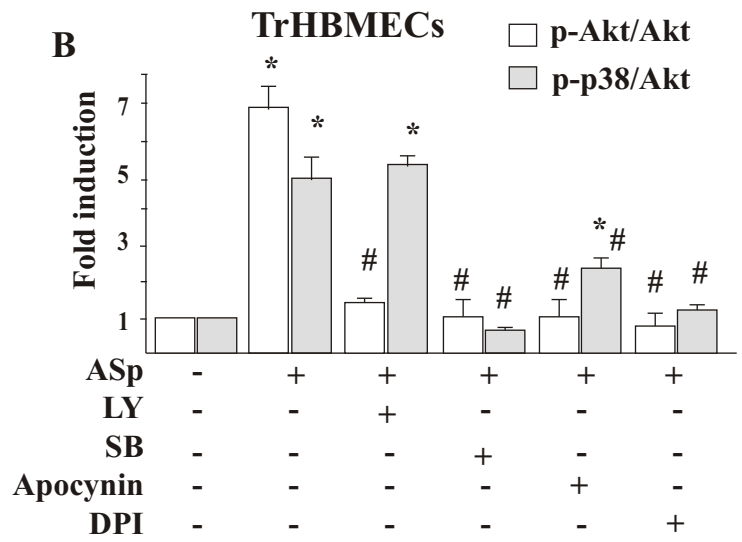

**C**

# TrHBMECs

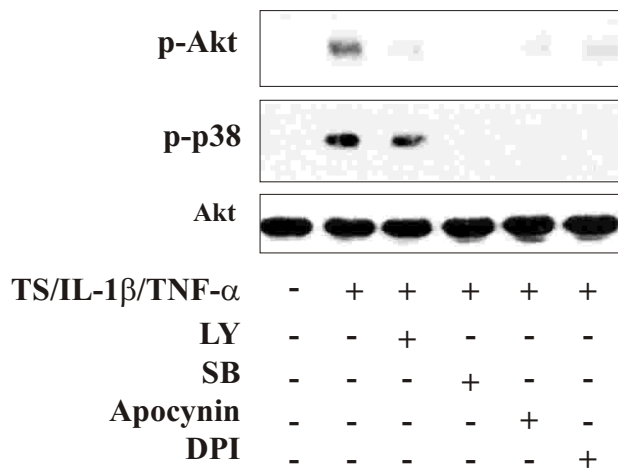

**D**

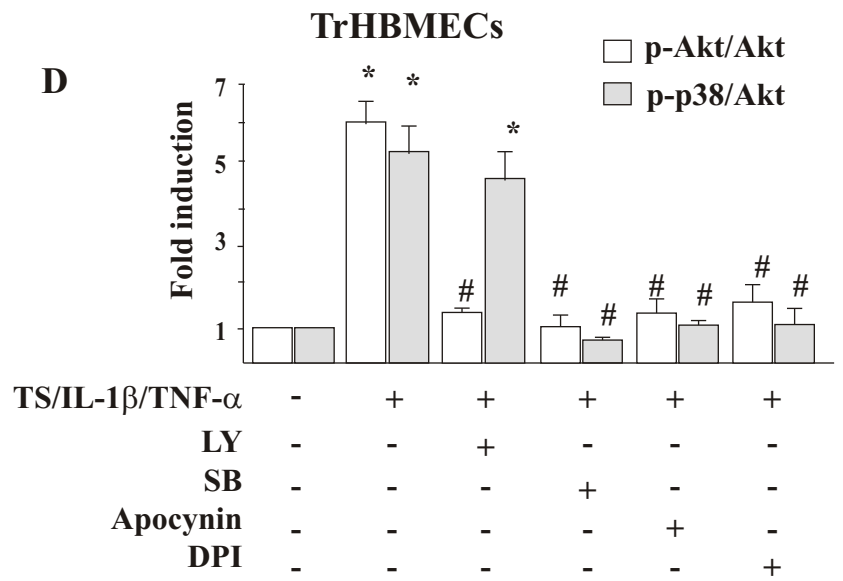

**Supplementary Figure S6**

Supplement: cvr032_Supplementary_Data.zip [file cvr032_Supplementary_Data.zip]

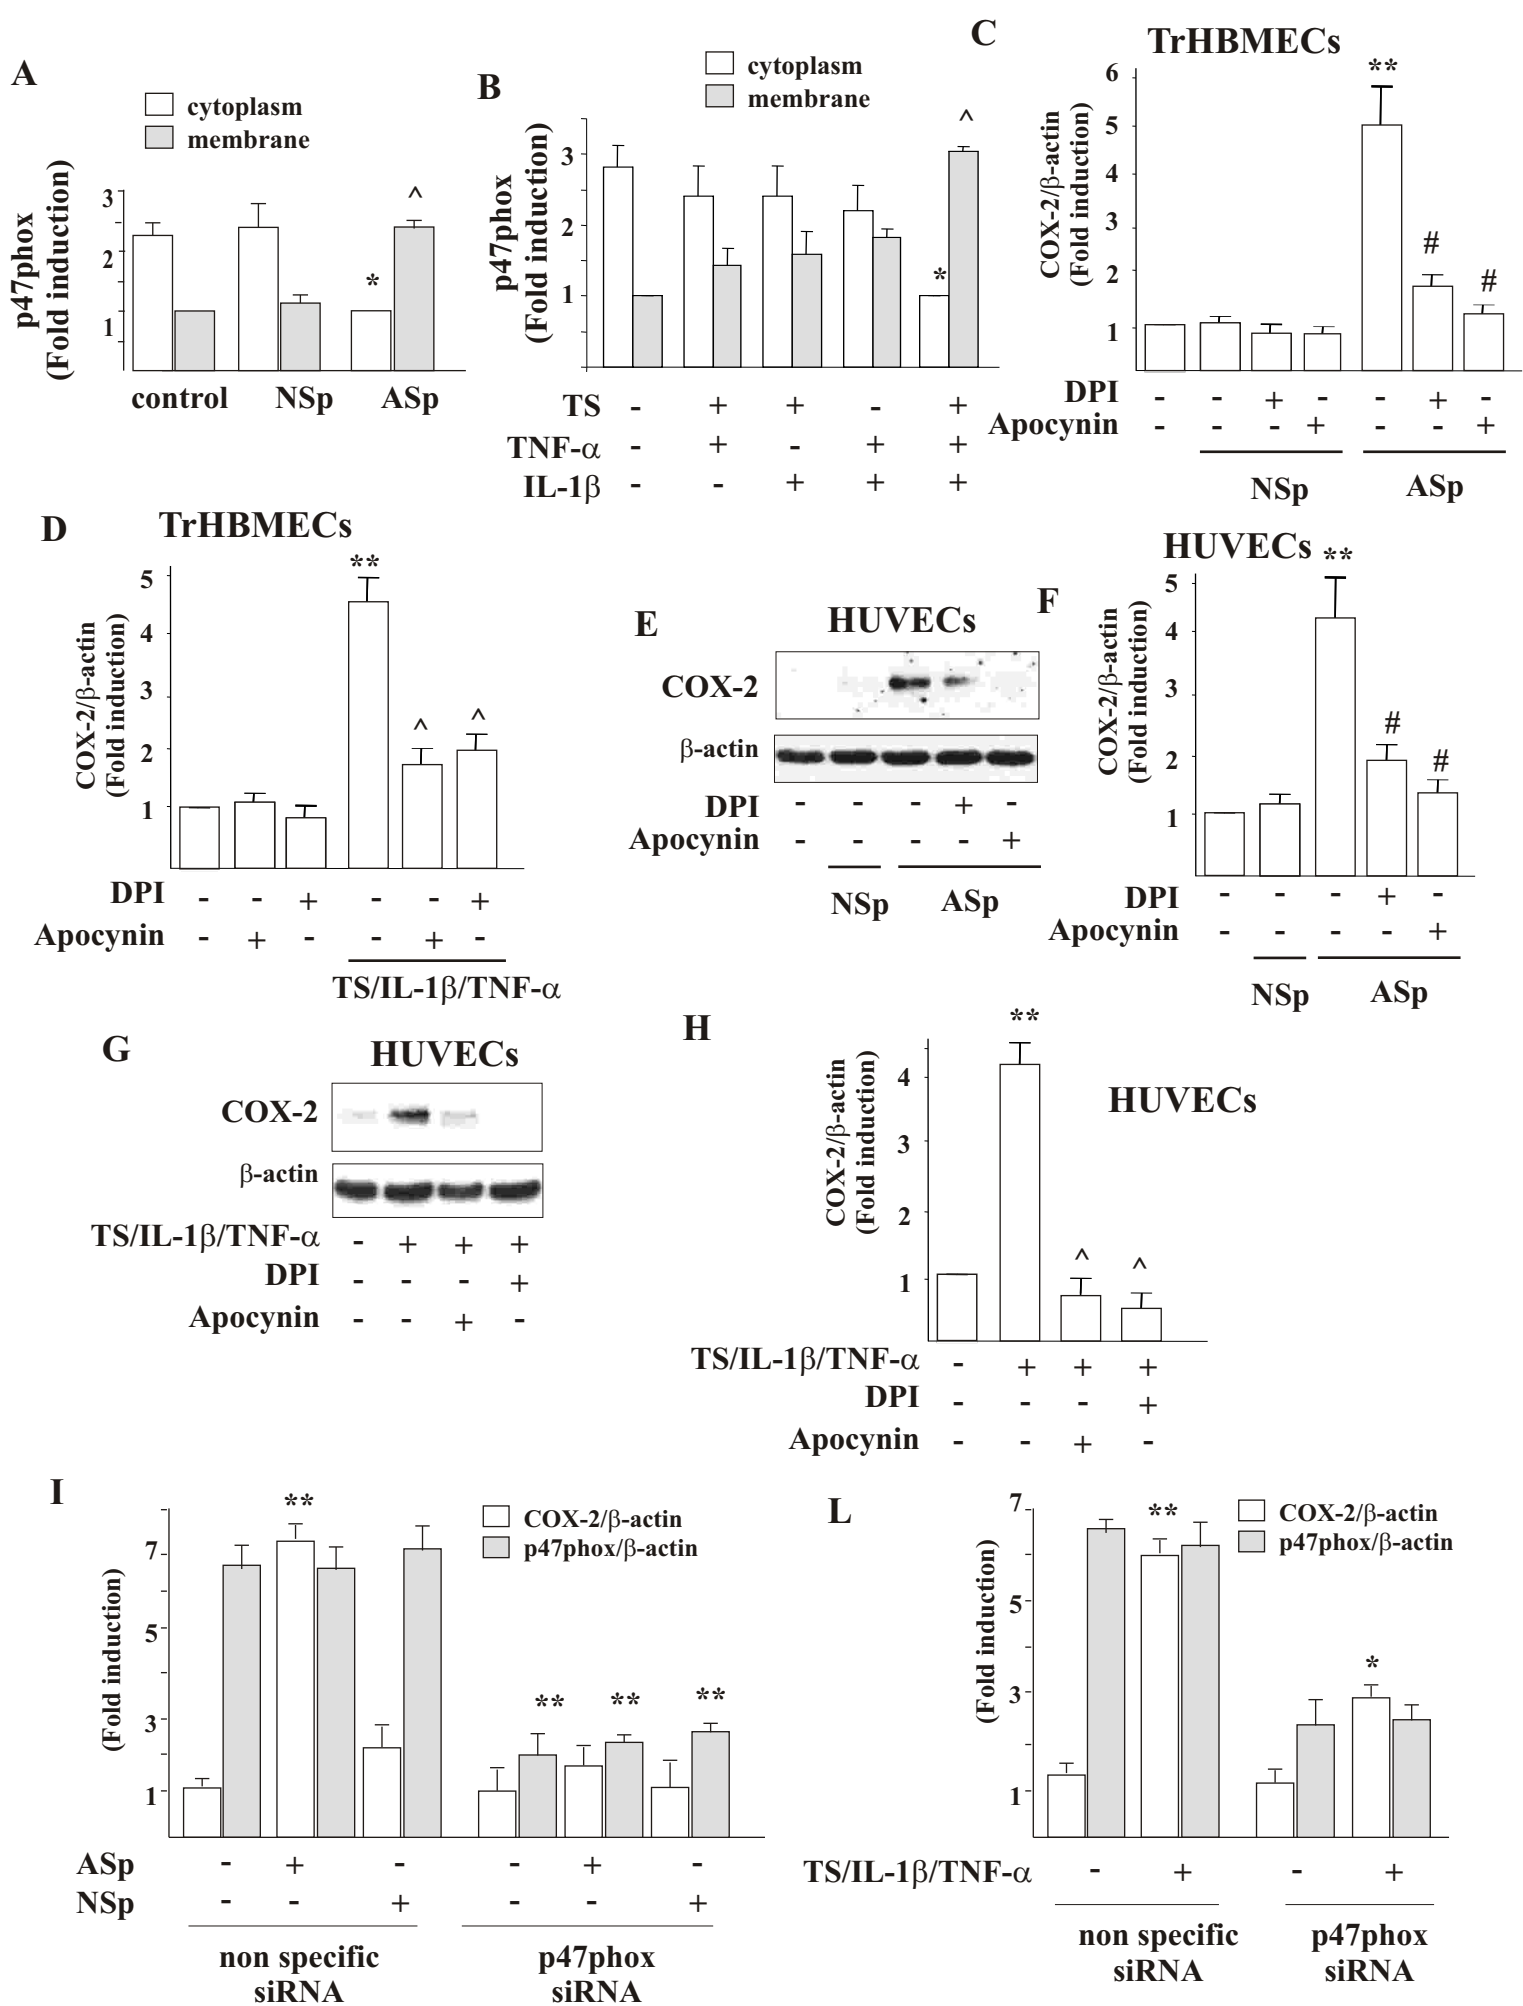

Supplementary Figure S4

Supplement: cvr032_Supplementary_Data.zip [file cvr032_Supplementary_Data.zip]

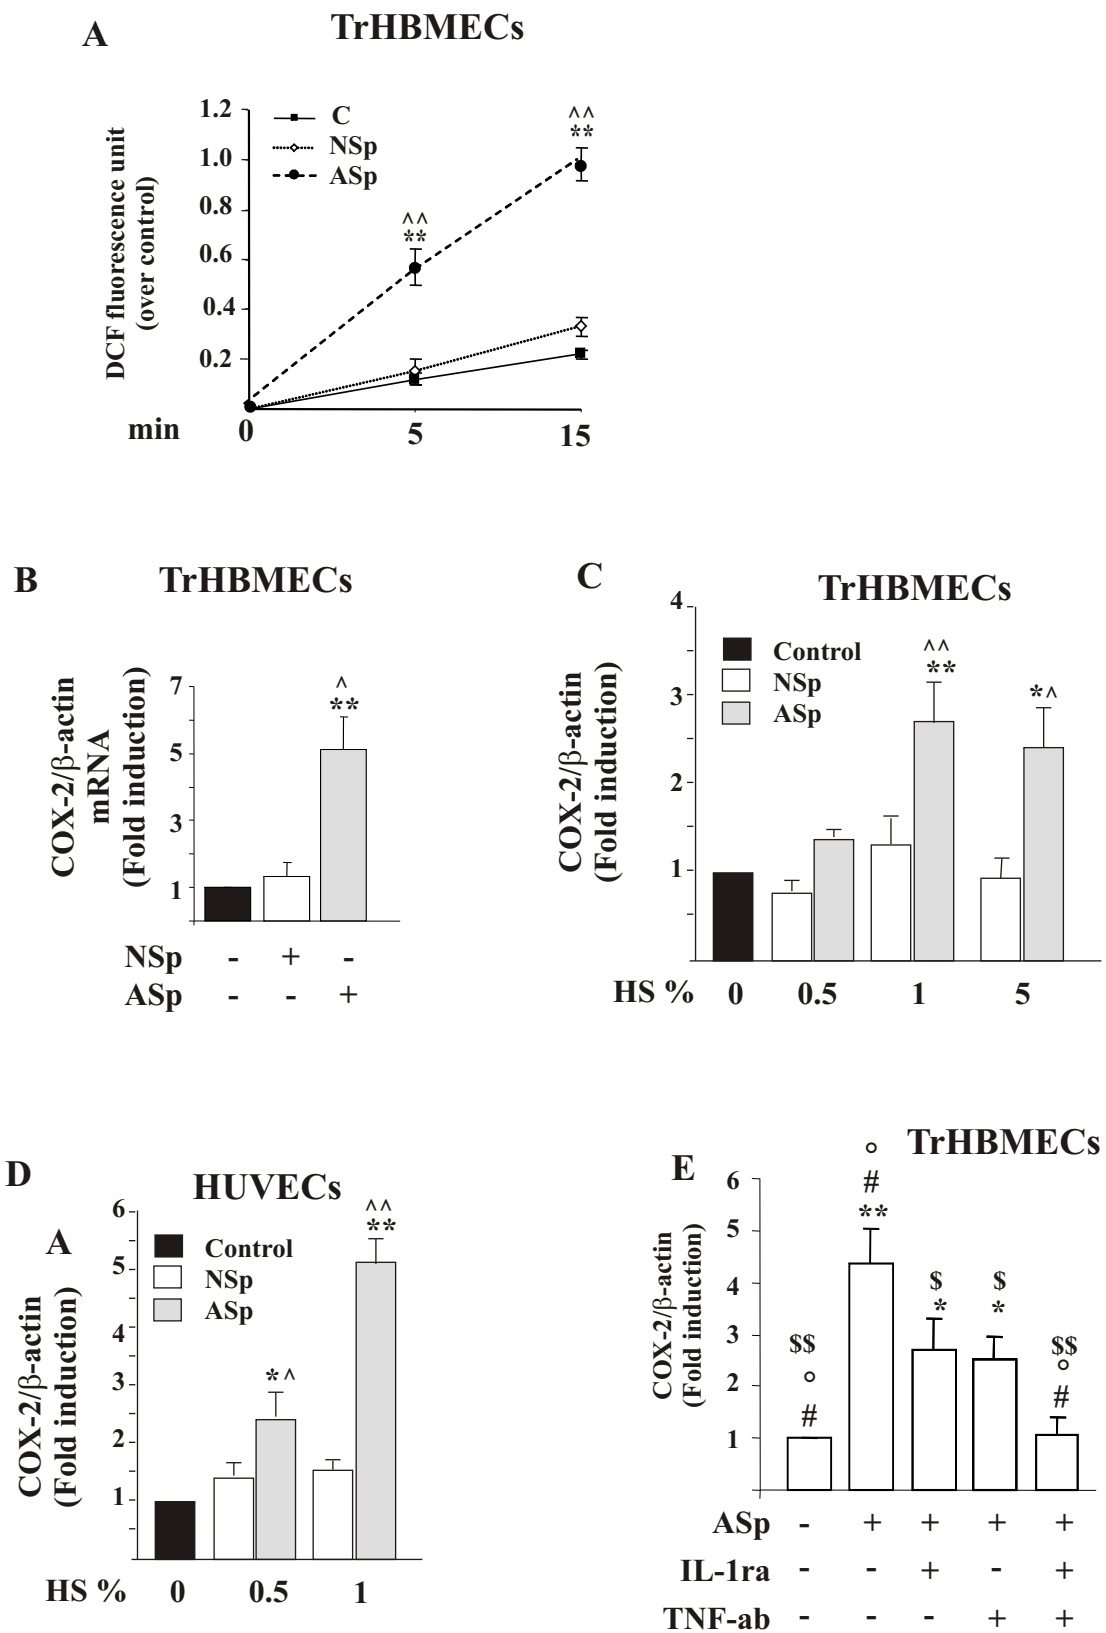

SupplementaryFigure S2

Supplement: cvr032_Supplementary_Data.zip [file cvr032_Supplementary_Data.zip]
